# Supplementary material
Source: Springer Nature journal article supplement (https://www.springermedizin.de/resource/supplementary/12889_2010_3256_MOESM4_ESM.pdf/9488568)

**1964: Data collection: somatic  
inpatient care**

**1973: Data collection: psychiatric  
inpatient care**

**1983: Around 85% of all somatic  
care reported to the IPR**

**1997: Data collection: Day-surgery**

**2001: Data collection:  
Hospital-based outpatient care**

1964: ICD-7

1968: ICD-8

1987: ICD-9

1997: ICD-10

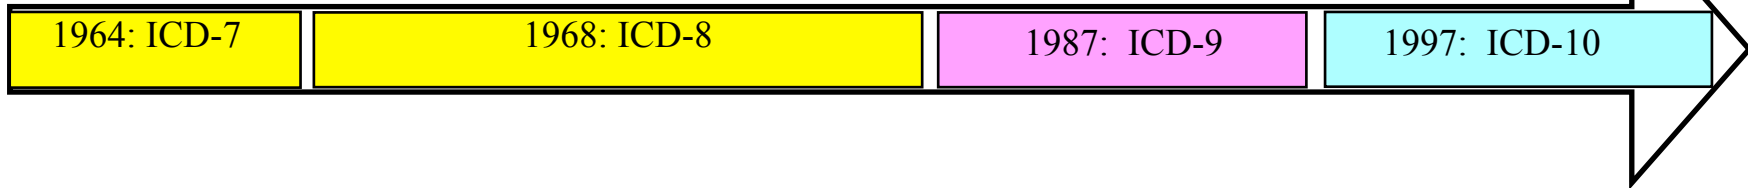

Supplement: MOESM4 [file 9488568]
